# Supplementary material
Source: PubMed Central journal article supplement (PMC3958043)
Supplement: MCB.01598-13_zmb999100343so1.pdf [file MCB.01598-13_zmb999100343so1.pdf]

**Table S1**

| <b>Subunit</b> | <b>Peptide</b>      | <b>Top Score</b> | <b>Site Probability</b>                         |  |
|----------------|---------------------|------------------|-------------------------------------------------|--|
| <b>CSN1</b>    | GERDSQTQAILTK       | 44.0             | T7: 92<br>S5: 8<br>T12: 0                       |  |
| <b>CSN1</b>    | SPPREGSQGELTPANSQSR | 32.9             | S7: 94<br>T12: 3<br>S1: 3                       |  |
| <b>CSN3</b>    | SMGSQEDDSGNKPSSYS   | 39.6             | S17: 78<br>Y16: 16<br>S15: 3<br>S14: 3<br>S9: 0 |  |
| <b>CSN8</b>    | KPVAGALDVSFNK       | 67.4             | S10: 100                                        |  |

**Table S1.** Site probabilities of phosphorylation sites on CSN1, CSN3 and CSN8 calculated by using Mascot Delta Score (63).
