# Supplementary material
Source: PubMed Central journal article supplement (PMC3958043)
Supplement: MCB.01598-13_zmb999100343so2.pdf [file MCB.01598-13_zmb999100343so2.pdf]

1 **Supplemental Figure S1**

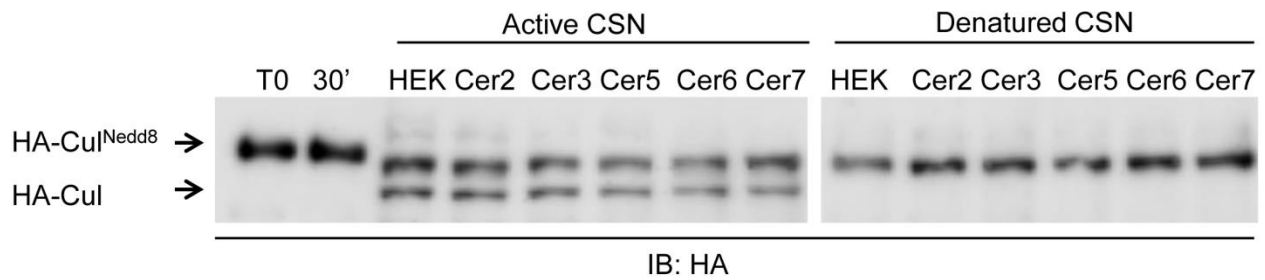

2

3 **FIG S1. Cell lines expressing fluorescent CSN subunits exhibit normal deneddylation activity.**

4 (A) Total proteins (50 µg), extracted from control and HEK293 cells that stably express the  
5 fluorescently tagged CSN 2, 3, 5, 6 and 7 subunits (Cer2, Cer3, Cer5, Cer6 and Cer7, respectively),  
6 were incubated with neddylated HA-Cul1 from *S. pombe* and monitored for deneddylation activity.  
7 Similar activity levels were detected in all samples. As controls, similar amounts of HA-Cul1, prior  
8 to (T0), or after 30 min incubation in the absence of cell extract (30'), were loaded and  
9 deneddylation assays were performed also with denatured HEK293 cell extracts, demonstrating that  
10 deneddylation does not occur in the absence of an active enzyme.

11
