# Supplementary material
Source: PubMed Central journal article supplement (PMC3958043)
Supplement: MCB.01598-13_zmb999100343so4.pdf [file MCB.01598-13_zmb999100343so4.pdf]

# 1 Supplemental Figure S3

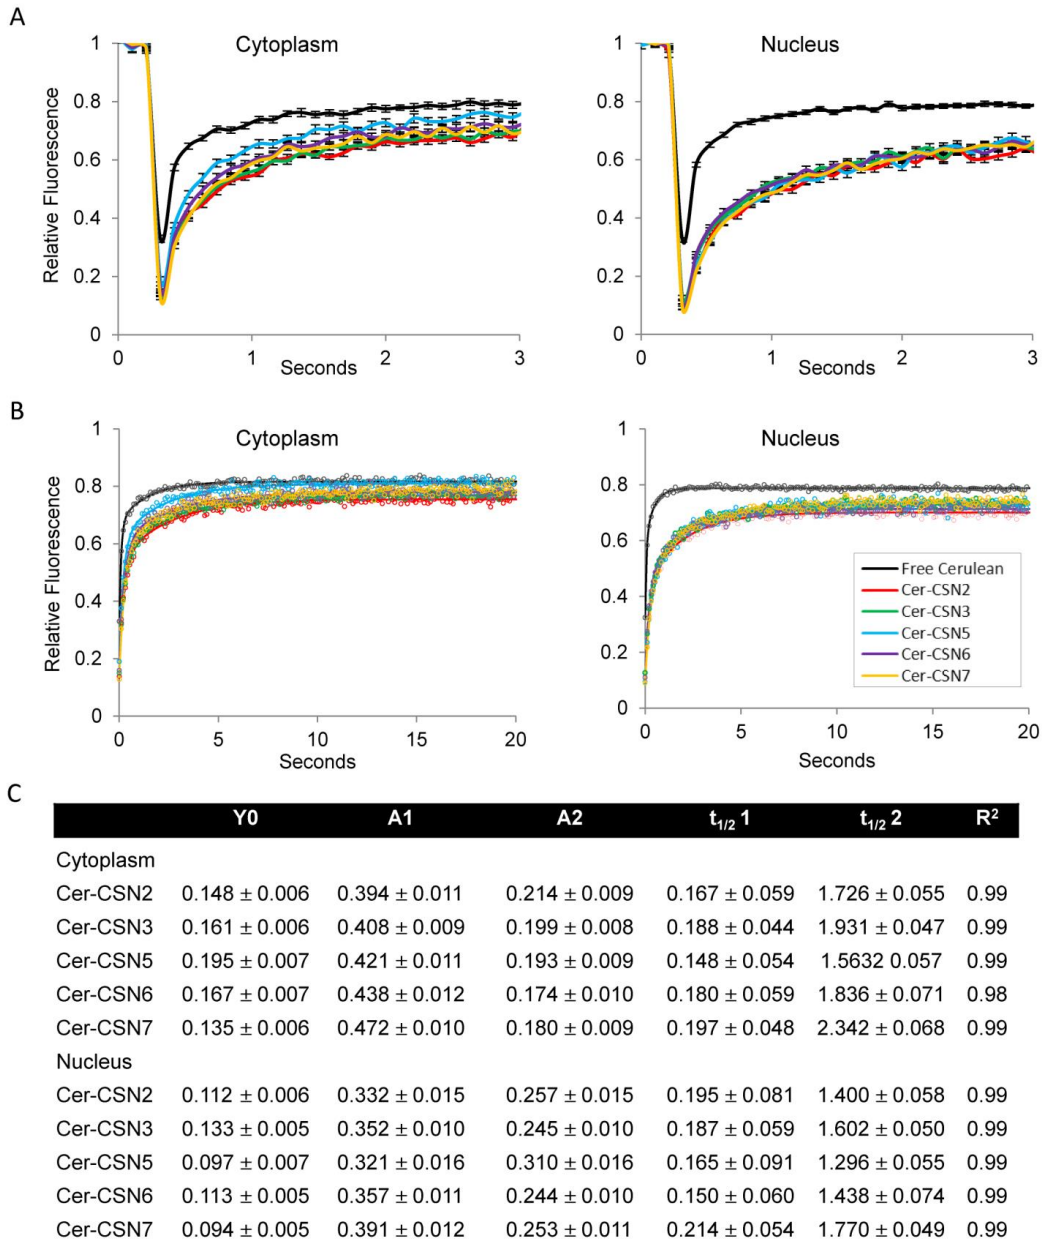

2

3 **Fig S3. FRAP analysis of nuclear and cytosolic CSN subunits.** (A) An expansion of the FRAP  
 4 curves shown in Figure 1A demonstrating the first three seconds of recovery. Bars represent standard  
 5 errors. (B) Recovery curves were fitted to a double exponential function  $y(t) = Y0 + A1(1-e^{-k1t}) +$   
 6  $A2(1-e^{-k2t})$ . Y0 represents the bleach depth, A1 and A2 are constants that represent the mobile  
 7 fractions, t is time (s) and k1 and k2 are the time constants. Fits (lines) were overlaid on top of the  
 8 measured FRAP curves (open circles), and likewise reflect the similarity of the recovery kinetics of

9 the CSN subunits, with the exception of cytosolic CSN5, which shows a more dynamic recovery. (C)  
10 Rate parameters of the fitted FRAP curves. The values of  $t_{1/2}1$  and  $t_{1/2}2$  were calculated using the  
11 equation:  $t_{1/2} = \ln(2) / k$ .  $R^2$  is the coefficient of determination of the fits.

12
