# Supplementary material
Source: PubMed Central journal article supplement (PMC3958043)
Supplement: MCB.01598-13_zmb999100343so5.pdf [file MCB.01598-13_zmb999100343so5.pdf]

1 **Supplemental Figure S4**

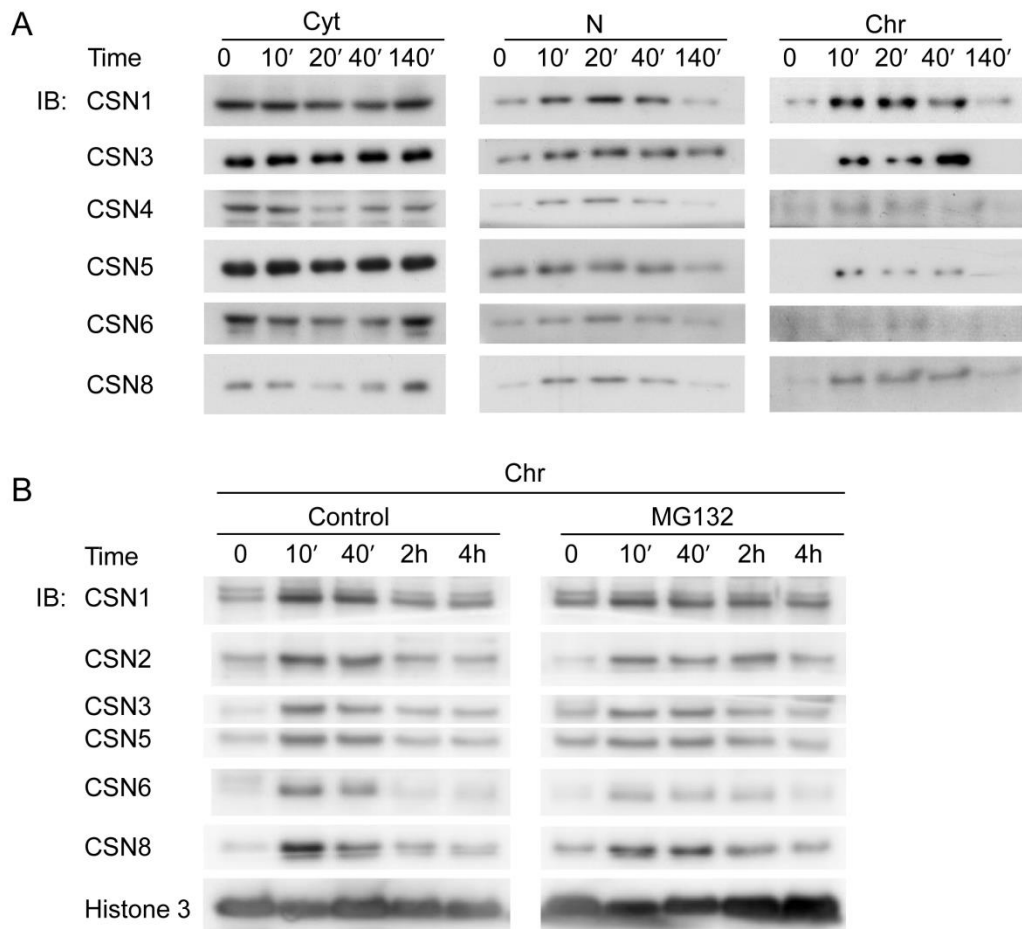

2

3 **FIG S4. Transient recruitment to the nucleus is due to redistribution of the complex between**  
 4 **compartments.** (A) Cells were incubated for 1 h with 50 µg/ml cycloheximide or (B) with 20µM  
 5 MG132 for 5 h and then exposed to 20 Joule/m<sup>2</sup> of UV irradiation. Cellular proteins were fractionated  
 6 into (Cyt), nucleoplasmic (N) and chromatin (Chr) fractions at different time points following DNA  
 7 damage induction, and detected by immunoblot analysis using different anti-CSN and anti-Histone 3  
 8 antibodies, as indicated. Neither cycloheximide (A) or MG132 (B) caused significant effect on the  
 9 transient accumulation of CSN in the nucleus following DNA damage.

10
